# Supplementary material
Source: Springer Nature journal article supplement (https://www.springermedizin.de/resource/supplementary/13058_2010_2627_MOESM5_ESM.pdf/9702184)

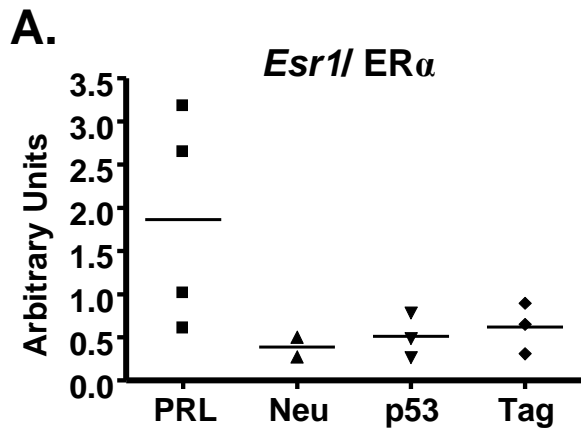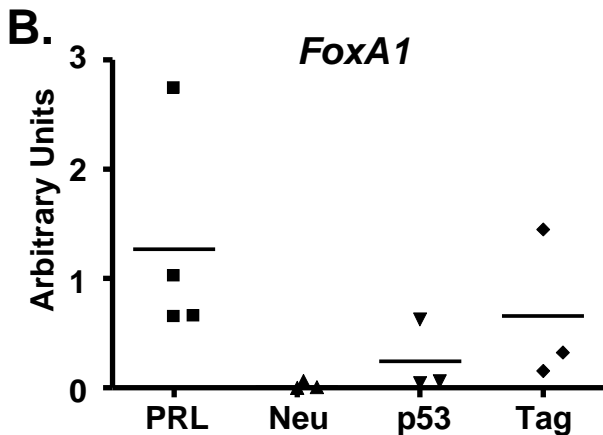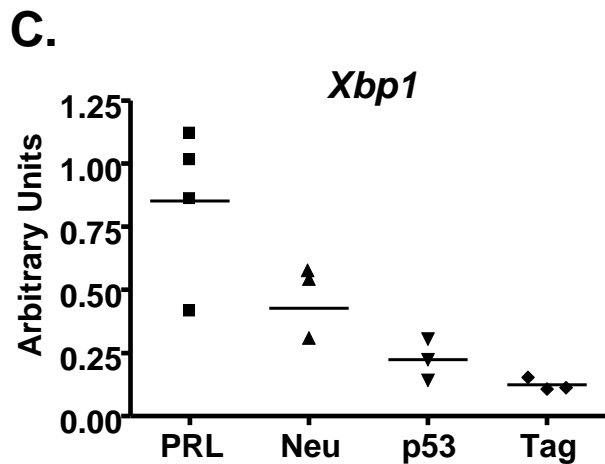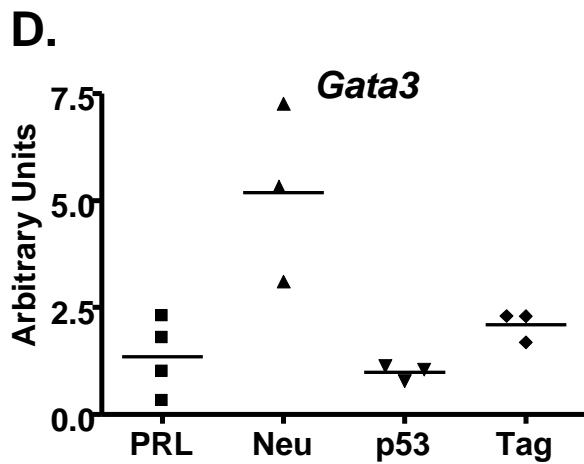

Supplement: MOESM5 [file 9702184]
